# Supplementary material for: Латиноамериканская литература в российском книгоиздании
Source: Royal Society of Chemistry journal article supplement (doi:10.1039/d1fo03752h), 2012-01-01
Supplement: d1fo03752h1.pdf [file d1fo03752h1.pdf]

## Supplementary data

### **Curcumin alleviates hepatic steatosis by improving mitochondrial function in postnatal overfed rats and fatty L02 cells through SIRT3 pathway**

Short title: Curcumin regulates hepatic mitochondrial function

Susu Du <sup>1</sup>, Xiaolei Zhu <sup>1</sup>, Nan Zhou<sup>1</sup>, Wen Zheng<sup>1</sup>, Wei Zhou<sup>1</sup>, Xiaonan Li<sup>1,2\*</sup>

<sup>1</sup>Department of Child Health Care, Children's Hospital of Nanjing Medical University, Nanjing, 210008, Jiangsu Province, China

<sup>2</sup>Institute of Pediatric Research, Nanjing Medical University, Nanjing, 210029, Jiangsu Province, China

#### **\*Corresponding author:**

Xiaonan Li,  
Department of Children's Health Care,  
Children's Hospital of Nanjing Medical University,  
72 Guangzhou Road,  
Nanjing 210008, P.R. China.

E-mail: [xiaonan6189@163.com](mailto:xiaonan6189@163.com)

**Table S1** Compositions (percentage by weight) of a normal diet and a high fat diet

|                    | Normal<br>diet (%) | High fat<br>diet (%) |
|--------------------|--------------------|----------------------|
| Casein             | 18.92              | 18.92                |
| L-Cystine          | 0.28               | 0.28                 |
| Corn starch        | 48.34              | 39.34                |
| Maltodextrin       | 3.32               | 3.32                 |
| Sucrose            | 13.0               | 13.0                 |
| Cellulose          | 4.74               | 4.74                 |
| Soybean oil        | 6.0                | 6.0                  |
| Lard               | 0.0                | 9.0                  |
| Vitamin mix        | 1.14               | 1.14                 |
| Mineral mix        | 4.26               | 4.26                 |
| Total              | 100.00%            | 100%                 |
| Energy (kcal/100g) | 392.60             | 438.24               |

The compositions were consistence with our previous study[1] and were produced by the diet manufacturing company Slac (Shanghai, China).

**Table S2** Serum liver enzymes and lipid biochemical parameters in rats at W3 and W13

|                | NL           | NH                        | SL                        | SH                         | SL-CUR                    | SH-CUR                       |
|----------------|--------------|---------------------------|---------------------------|----------------------------|---------------------------|------------------------------|
| <b>W3</b>      |              |                           |                           |                            |                           |                              |
| ALT (U/L)      | 27.50±1.78   | ---                       | 29.17±1.30                | ---                        | ---                       | ---                          |
| AST (U/L)      | 151.00±11.30 | ---                       | 161.80±9.54               | ---                        | ---                       | ---                          |
| TG (mmol/L)    | 0.59±0.13    | ---                       | 0.64±0.13                 | ---                        | ---                       | ---                          |
| CHO (mg/dL)    | 2.01±0.13    | ---                       | 2.05±0.04                 | ---                        | ---                       | ---                          |
| HDL-c (mmol/L) | 0.54±0.06    | ---                       | 0.53±0.03                 | ---                        | ---                       | ---                          |
| <b>W13</b>     |              |                           |                           |                            |                           |                              |
| ALT (U/L)      | 33.13±2.34   | 43.50±5.89 <sup>c</sup>   | 35.50±3.70                | 60.50±9.34 <sup>a, b</sup> | 34.50±3.09 <sup>c</sup>   | 39.88±7.64 <sup>c</sup>      |
| AST (U/L)      | 105.40±22.45 | 129.00±17.94              | 105.80±9.94               | 138.30±22.51               | 103.90±10.21              | 102.50±14.98                 |
| TG (mmol/L)    | 0.35±0.02    | 0.62±0.06 <sup>a</sup>    | 0.47±0.05 <sup>a</sup>    | 0.79±0.11 <sup>a, b</sup>  | 0.33±0.04 <sup>b, c</sup> | 0.54±0.09 <sup>a</sup>       |
| CHO (mg/dL)    | 1.03±0.06    | 1.45±0.10 <sup>a</sup>    | 1.42±0.11 <sup>a</sup>    | 1.68±0.17 <sup>a</sup>     | 1.10±0.02 <sup>b, c</sup> | 1.35±0.11 <sup>a</sup>       |
| HDL-c (mmol/L) | 0.34±0.02    | 0.19±0.01 <sup>a, b</sup> | 0.27±0.02 <sup>a, c</sup> | 0.15±0.02 <sup>a, b</sup>  | 0.34±0.03 <sup>b, c</sup> | 0.22±0.02 <sup>a, b, c</sup> |

Data are expressed as the mean ± SEM. n = 6 at W3 and n = 8 at W13 in each group.

Student's unpaired *t*-test at W3 and one-way analysis of variance (ANOVA) with a post hoc least significant difference (LSD)-*t* test at W13 were performed. <sup>a</sup>p<0.05 versus NL group AT W13; <sup>b</sup>p<0.05 versus SL group at W13; <sup>c</sup>p<0.05 versus SH group at W13

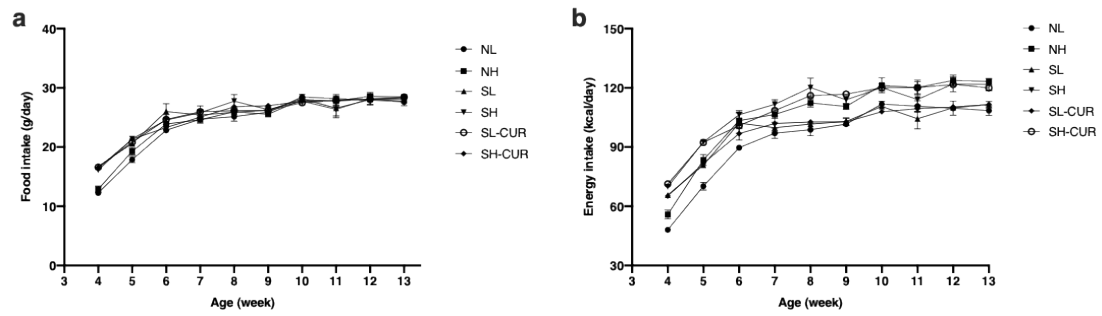

**Fig. S1** Effects of CUR on food intake (a) and energy intake (b) in rats from W4 to W13. Data are expressed as the mean  $\pm$  SEM.  $n = 6$  at W3 and  $n = 8$  at W13 in each group

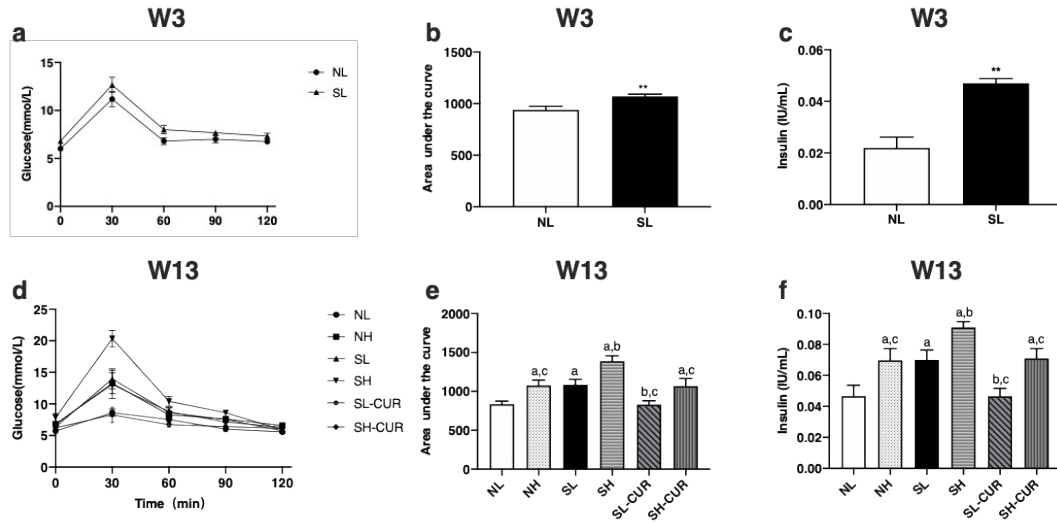

**Fig. S2** Effects of CUR on IPGTT results, AUC and serum levels of insulin in rats at W3 (a-c) and W13 (d-f). Data are expressed as the mean  $\pm$  SEM.  $n = 6$  at W3 and  $n = 8$  at W13 in each group. Statistical analysis was performed using Student's unpaired  $t$ -test at W3 and ANOVA with a post hoc least significant difference (LSD)- $t$  test at W13. \*\* $p < 0.01$  versus NL group at W3; <sup>a</sup> $p < 0.05$  versus NL group at W13; <sup>b</sup> $p < 0.05$  versus SL group at W13; <sup>c</sup> $p < 0.05$  versus SH group at W13

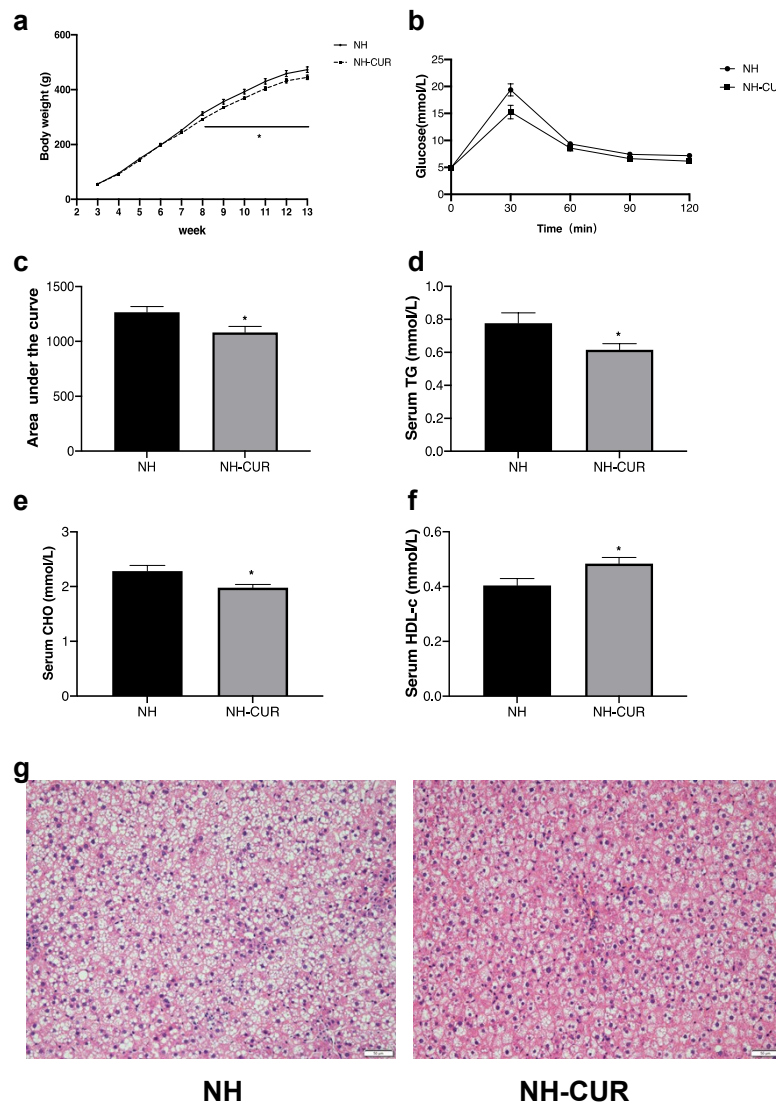

**Fig. S3** Effects of CUR on NH rats. Body weight line (a) 、IPGTT results and AUC (b-c), serum TG (d), CHO (e) and HDL-c (f) levels and hepatic H&E staining (g) in NH rats and NH-CUR rats at W13. Data are expressed as the mean  $\pm$  SEM. n = 8. Statistical analysis was performed using Student's unpaired *t*-test. \**p*<0.05 versus NH group

#### Reference

1. Yang F, Zhou N, Zhu X, Min C, Zhou W, Li X (2021) n-3 PUFAs protect against adiposity and fatty liver by promoting browning in postnatally overfed male rats: a role for NRG4. *J Nutr Biochem* 93:108628. <https://doi.org/10.1016/j.jnutbio.2021.108628>
