# Supplementary material for: Латиноамериканская литература в российском книгоиздании
Source: Royal Society of Chemistry journal article supplement (doi:10.1039/d1fo03752h), 2012-01-01
Supplement: d1fo03752h2.pdf [file d1fo03752h2.pdf]

### Western blot data

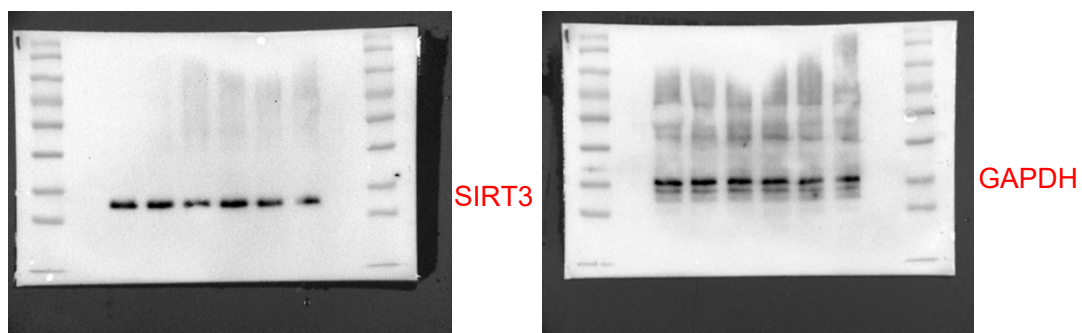

Fig. 5q Protein expression levels of SIRT3 in rats at W3

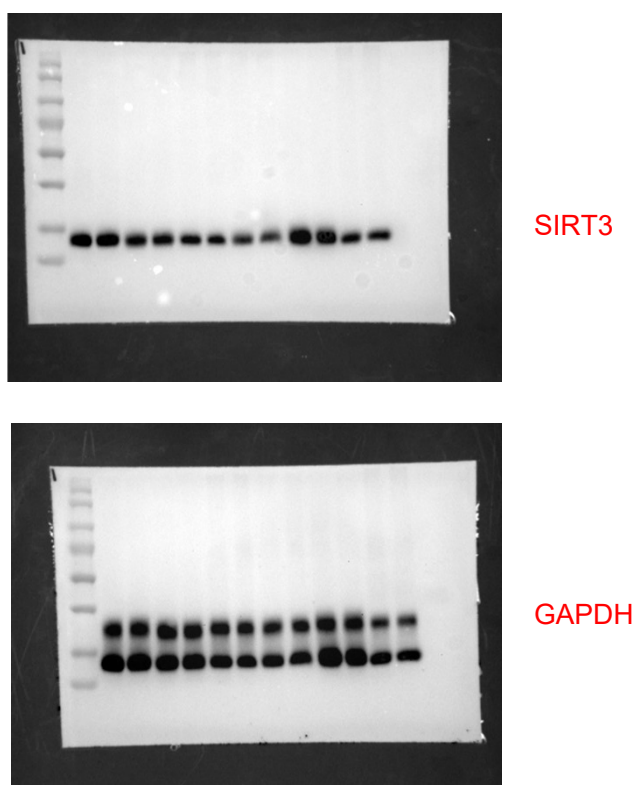

Fig. 5t Protein expression levels of SIRT3 in rats at W13

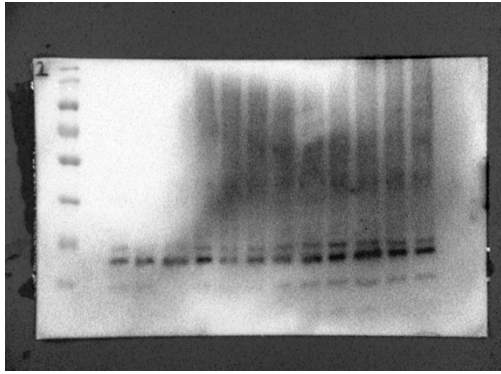

SIRT3

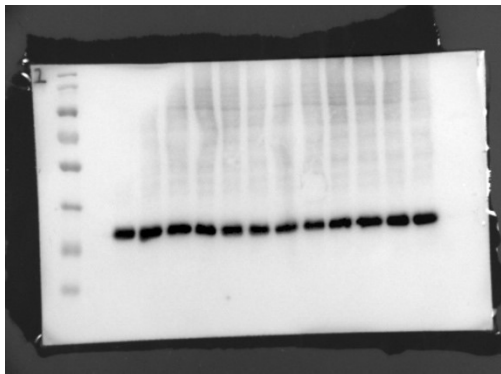

GAPDH

**Fig. 6j Protein expression levels of SIRT3 in L02 cells**

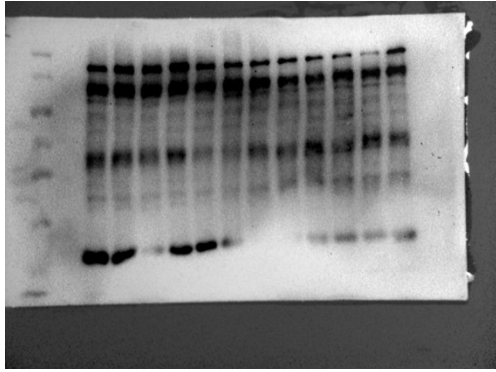

p-AMPK

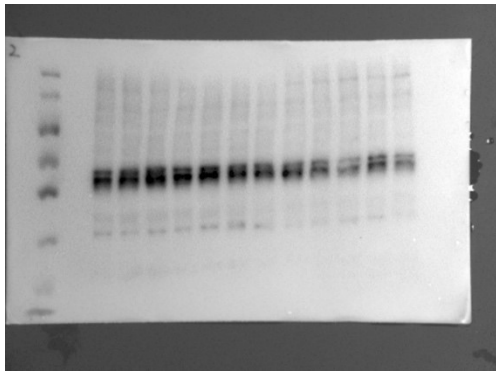

AMPK

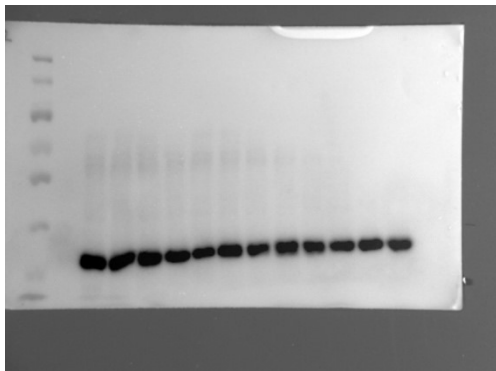

GAPDH

**Fig. 6j Protein expression levels of p-AMPK / AMPK in L02 cells**
